# Supplementary material for: Effect of charge localization on the in vivo optical imaging properties of near-infrared cyanine dye/monoclonal antibody conjugates
Source: Royal Society of Chemistry journal article supplement (doi:10.1039/c6mb00371k), 2016-07-22
Supplement: c6mb00371k1.pdf [file c6mb00371k1.pdf]

**A**

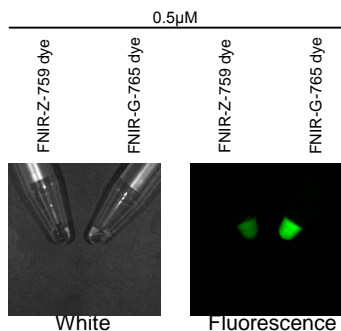

**B**

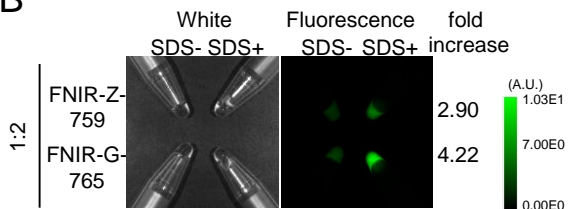

**C**

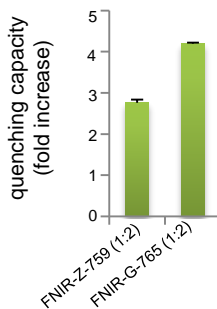

**D**

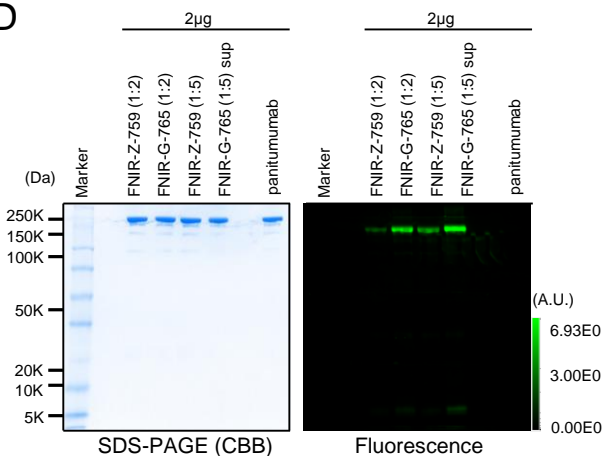

**E**

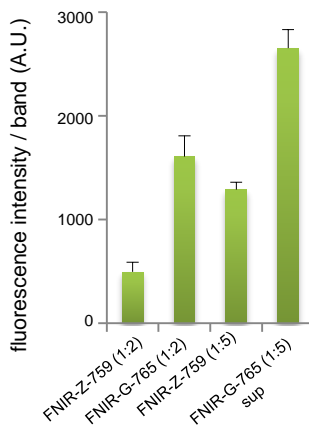

## **Supplementary Figure 1.**

### ***In vitro* characterization of FNIR-Z-759 and FNIR-G-765 conjugates.**

(A) The white (left) and fluorescence (right) images of each dye solution. (B) With SDS, the conjugates are chemically dequenched. Dequenching capacities are shown on the right. (C) Quantification of dequenching capacities (n=3). (D) Validation of the conjugates by SDS-PAGE. (E) Quantification of fluorescence intensities in each conjugate band (n=3).

## Supplemental Figure 2

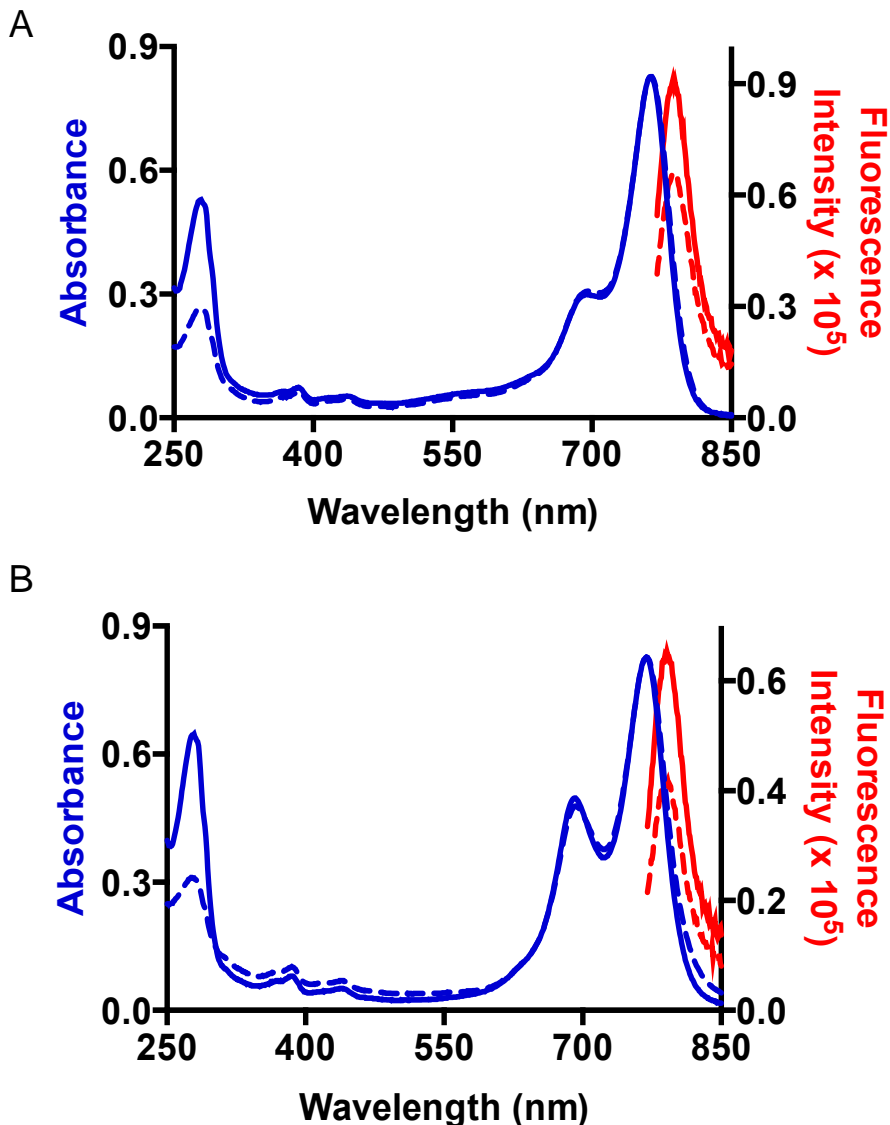

### Supplemental Figure 2.

#### *In vitro* characterization of FNIR-Z-759 and FNIR-G-765 conjugates.

Absorption (blue) and emission (red) curves for 1:2 FNIR-Z-759 (A, solid), 1:5 FNIR-Z-759 (A, dashed), 1:2 FNIR-G-765 (B, solid), and FNIR-G-765 (B, dashed) mAb-dye conjugates in 1:1 MeOH/PBS (pH 7.4) at an effective dye concentration of 5 mM.

Emission curves were collected after excitation at the near-IR absorption maximum of each dye (764 nm for FNIR-Z-759 and 769 nm for FNIR-G-765).
